# Supplementary material for: Controllable preparation of magnetic carbon nanocomposites by pyrolysis of organometallic precursors, similar molecular structure but very different morphology, composition and properties
Source: Royal Society of Chemistry journal article supplement (doi:10.1039/d0nj05699e), 2020-12-24
Supplement: d0nj05699e1.pdf [file d0nj05699e1.pdf]

*Electronic Supplementary Information (ESI)*

**Controllable preparation of magnetic carbon nanocomposites by  
pyrolysis of organometallic precursors, similar molecular structure  
but very different morphology, composition and properties**

Zhijun Ruan,<sup>a</sup> Jingwen Ran,<sup>a</sup> Shanshan Liu,<sup>a</sup> Yanmei Chen,<sup>\*a</sup> Xichao Wang,<sup>a</sup> Jie Shi,<sup>\*b</sup> Lihong  
Zhu,<sup>a</sup> Shengfang Zhao<sup>a</sup> and Junqi Lin<sup>\*a</sup>

<sup>a</sup> Hubei Key Laboratory of Processing and Application of Catalytic Materials, College of Chemistry and  
Chemical Engineering, Huanggang Normal University, Huanggang 438000, China.

<sup>b</sup> School of Food and Biological Engineering, Hefei University of Technology, Hefei 230009, China.

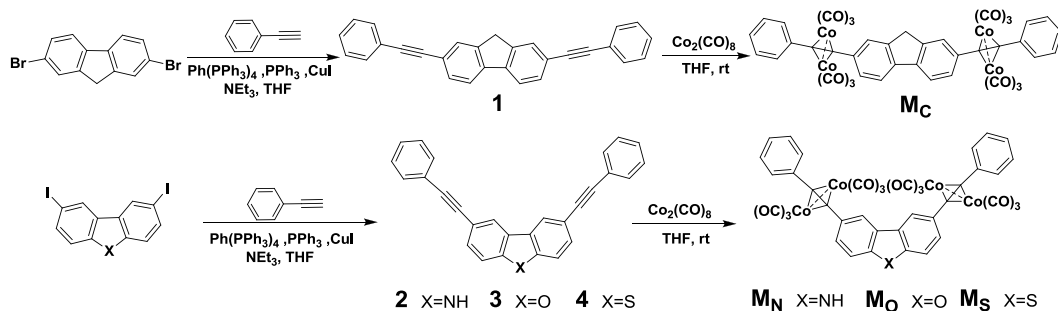

**Scheme S1.** Synthetic pathway of organometallic precursors **M<sub>C</sub>**, **M<sub>N</sub>**, **M<sub>O</sub>** and **M<sub>S</sub>**.

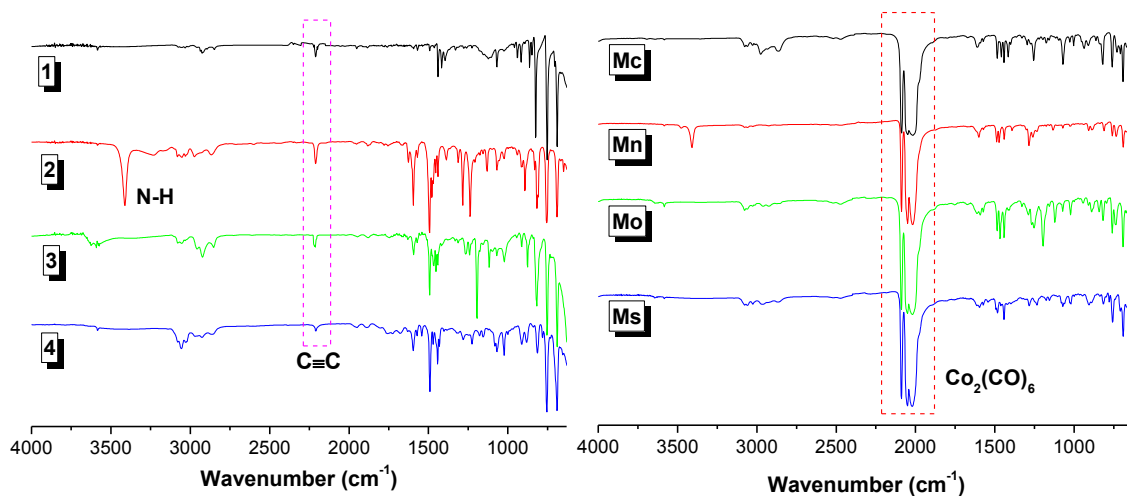

**Figure S1.** IR spectra of compounds **1-4** and organometallic precursors **M<sub>C</sub>**-**M<sub>S</sub>**.

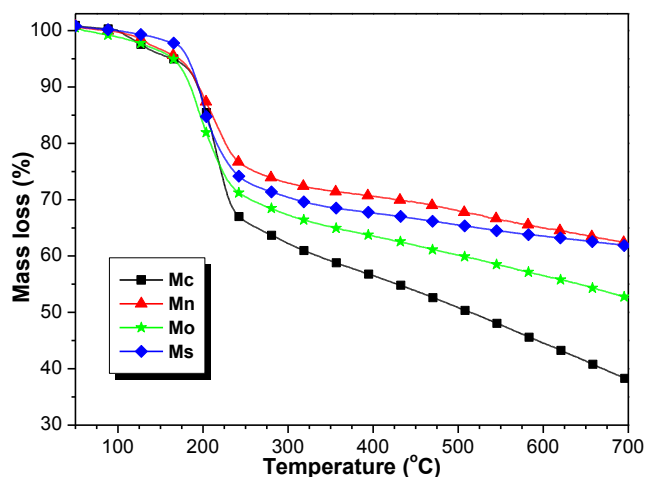

**Figure S2.** TGA thermograms of organometallic precursors **M<sub>C</sub>**, **M<sub>N</sub>**, **M<sub>O</sub>** and **M<sub>S</sub>** measured under nitrogen at a heating rate of 10 °C min<sup>-1</sup>.

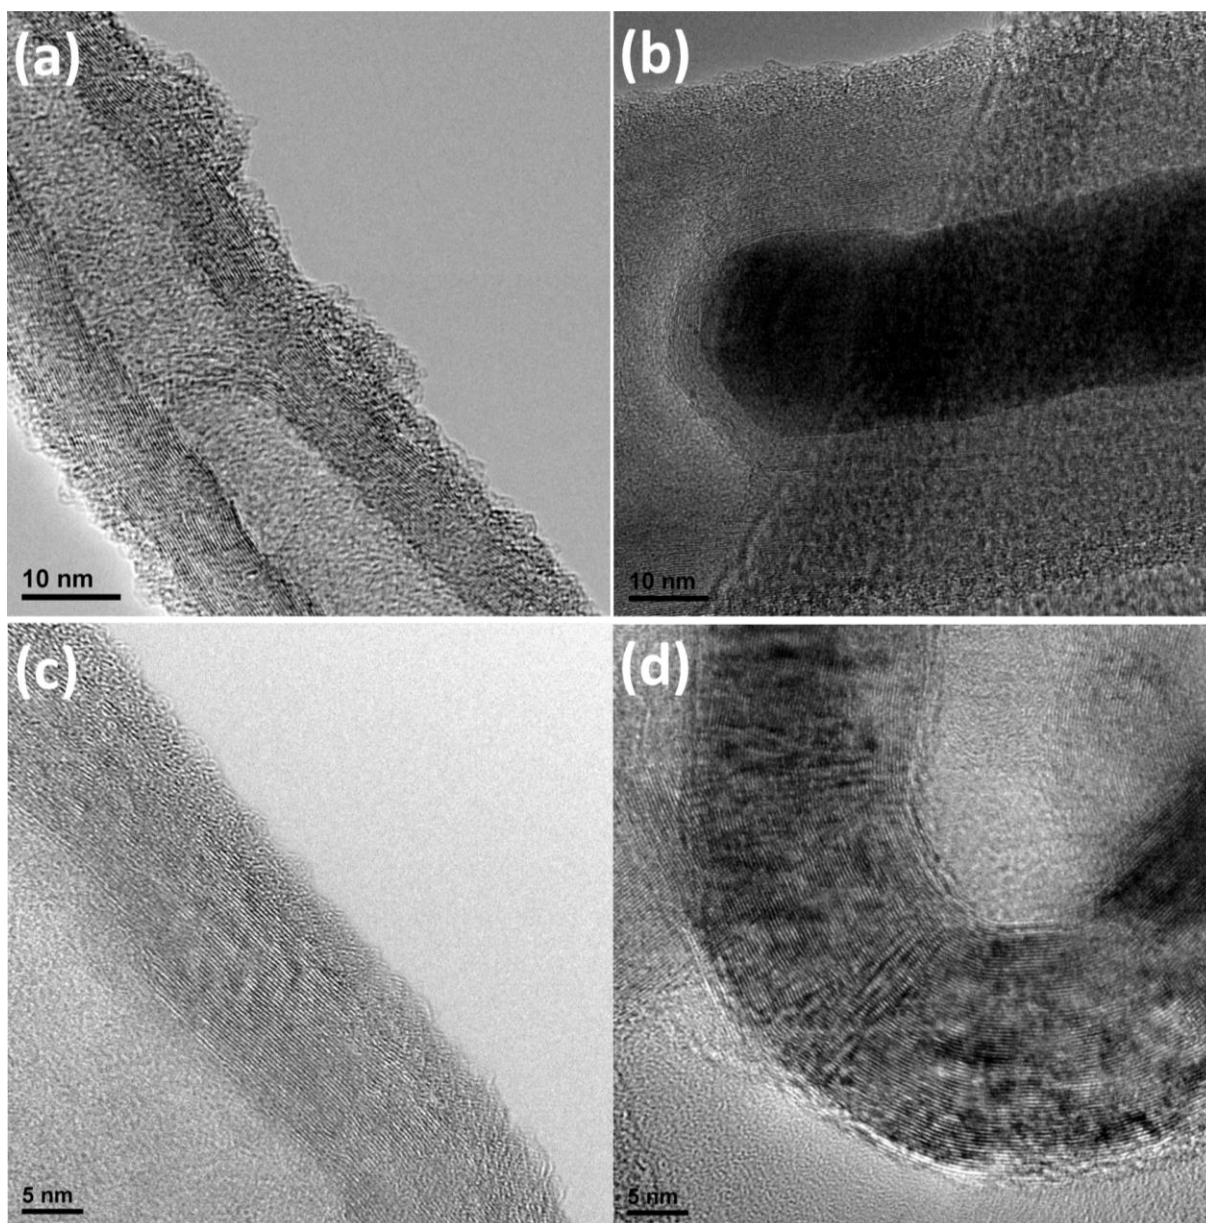

**Figure S3.** HRTEM images of the CNTs obtained through pyrolysis of  $M_C$  (a, b) and  $M_N$  (c, d).

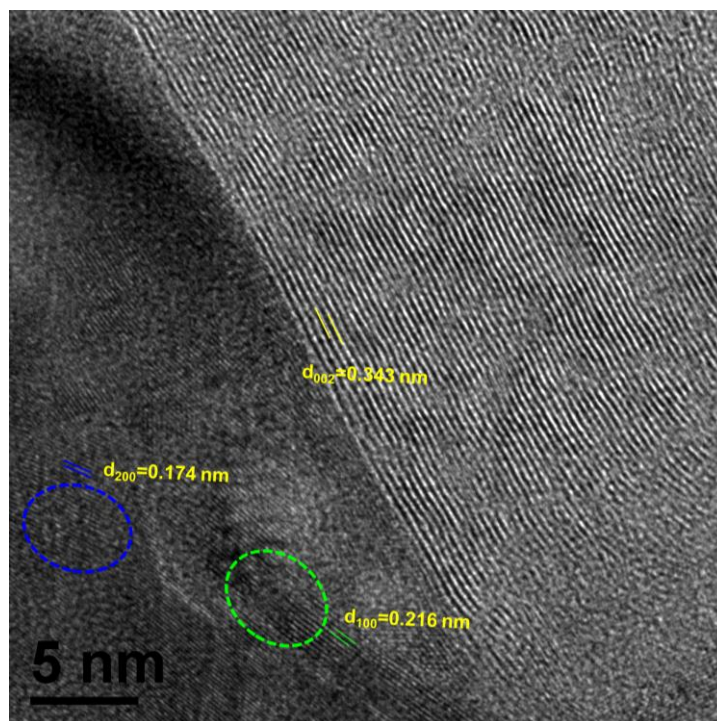

**Figure S4.** HRTEM images of the nanoparticles obtained through pyrolysis of  $M_0$ .

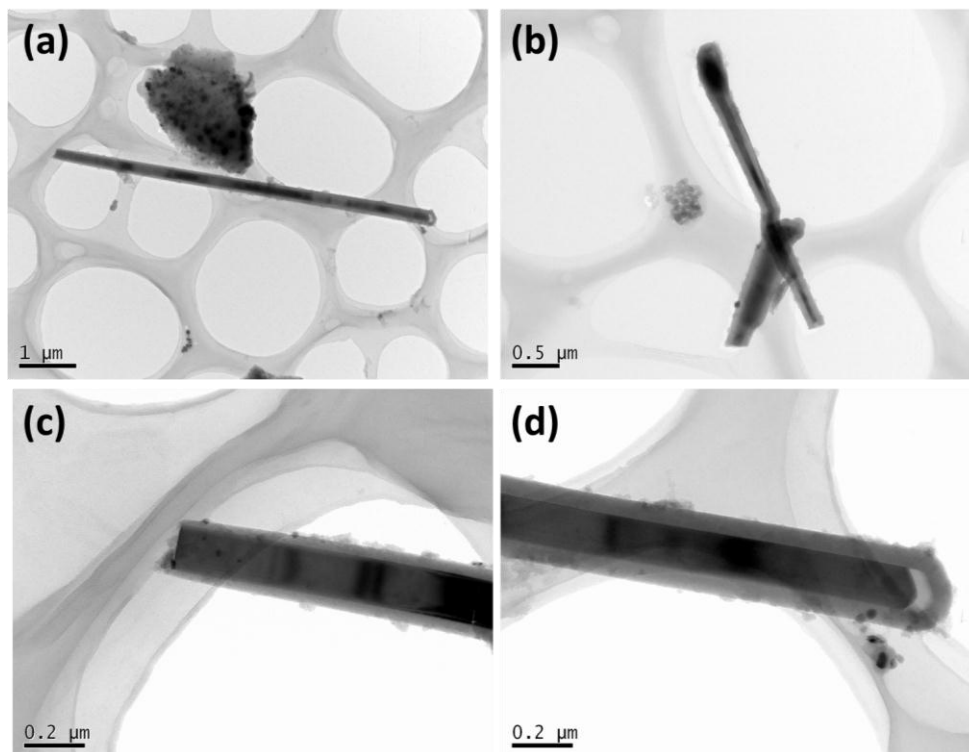

**Figure S5.** TEM images of the cobalt core/carbon sheath nanocable obtained through pyrolysis of  $M_5$ .

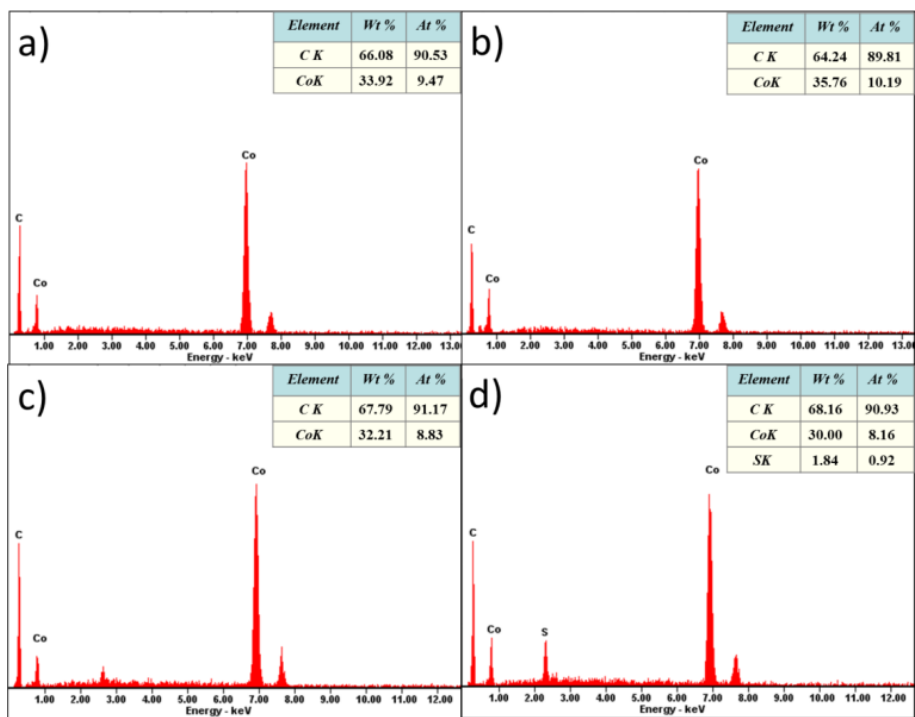

**Figure S6.** SEM-EDX spectra of the materials obtained from pyrolysis of  $M_C-S$  (a),  $M_N-S$  (b),  $M_O-S$  (c) and  $M_S-S$  (d).

## Experimental Section

**General procedure for the synthesis of compounds 1-4:** A mixture of 2,7-Dibromofluorene or 3,6-Diiodocarbazole or 2,8-Diiododibenzofuran or 2,8-Diiododibenzothiophene (1.00 equiv), CuI (20% equiv), triphenylphosphine (PPh<sub>3</sub>) (10% equiv), tetrakis (triphenylphosphine) palladium (Pd(PPh<sub>3</sub>)<sub>4</sub>) (5 mol%) and THF/triethylamine (2:1 in volume), was charged with argon, and then phenylacetylene (3.00 equiv) was added dropwise by syringe. The reaction was stirred at 50-80 °C for 12 h. After cooled to room temperature, the mixture was filtered. The filtrate was evaporated to remove the solvent. The crude product was purified by column chromatography.

Compound **1**: White powder (1.22 g, 75%). <sup>1</sup>H NMR (300 MHz, CDCl<sub>3</sub>) δ (ppm): 7.75 (m, 4H, ArH), 7.57 (m, 6H, ArH), 7.36 (m, 6H, ArH), 3.94 (s, 2H, -CH<sub>2</sub>-). MS (EI), *m/z* [M<sup>+</sup>]: 366.2, calcd: 366.1.

Compound **2**: White powder (1.43 g, 78%). <sup>1</sup>H NMR (300 MHz, CDCl<sub>3</sub>) δ (ppm): 8.27 (s, 2H, ArH), 8.24 (s, 1H, N-H), 7.64 (s, 2H, ArH), 7.59 (d, J = 9 Hz, 4H, ArH), 7.40 (m, 8H, ArH). MS (EI), *m/z* [M<sup>+</sup>]: 367.1, calcd: 367.1.

Compound **3**: White-off powder (0.58 g, 55%). <sup>1</sup>H NMR (300 MHz, CDCl<sub>3</sub>) δ (ppm): 8.13 (s, 2H, ArH), 7.68 (d, J = 8.4 Hz, 2H, ArH), 7.57 (m, 6H, ArH), 7.38 (m, 6H, ArH). MS (EI), *m/z* [M<sup>+</sup>]: 368.2, calcd: 368.1.

Compound **4**: White-off powder (0.62 g, 60%). <sup>1</sup>H NMR (300 MHz, CDCl<sub>3</sub>) δ (ppm): 8.36 (s, 2H, ArH), 7.85 (d, J = 8.1 Hz, 2H, ArH), 7.60 (m, 6H, ArH), 7.37 (m, 6H, ArH). MS (EI), *m/z* [M<sup>+</sup>]: 384.2, calcd: 384.1.

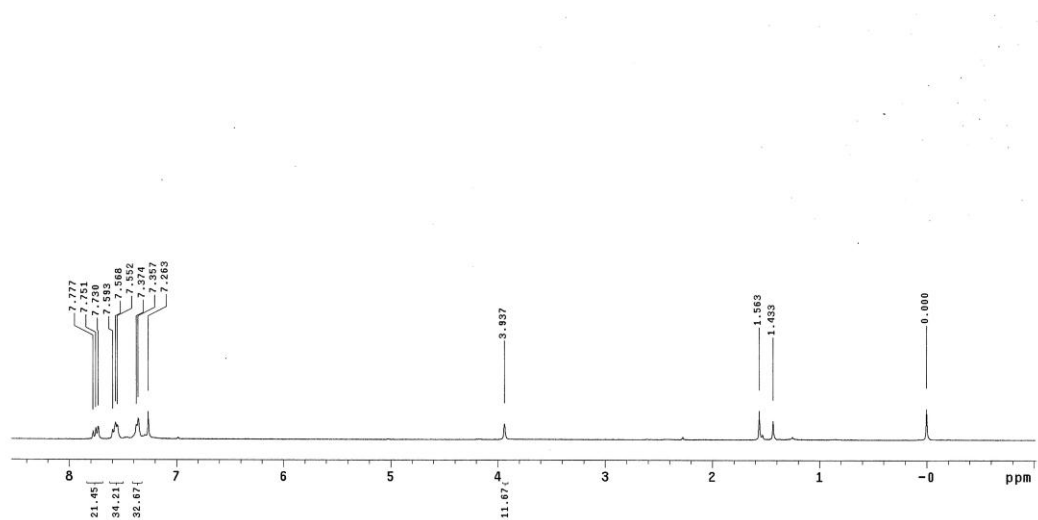

Figure S7.  $^1\text{H}$  NMR spectrum of **1** in  $\text{CDCl}_3$ .

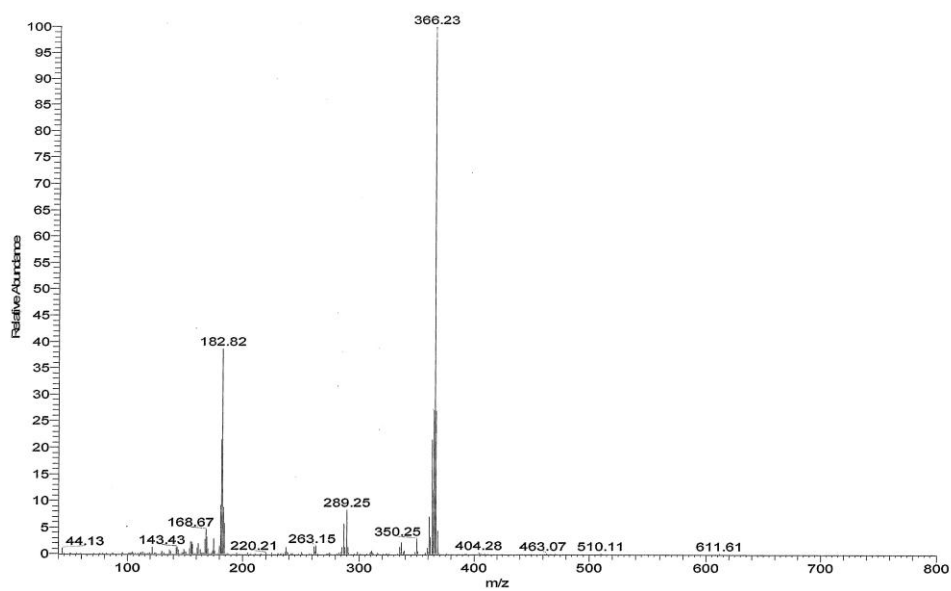

Figure S8. MS (EI) spectrum of **1**.

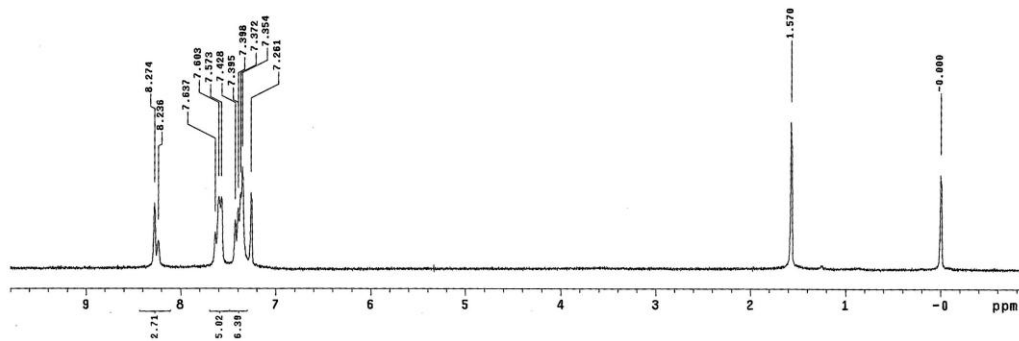

**Figure S9.** <sup>1</sup>H NMR spectrum of **2** in CDCl<sub>3</sub>.

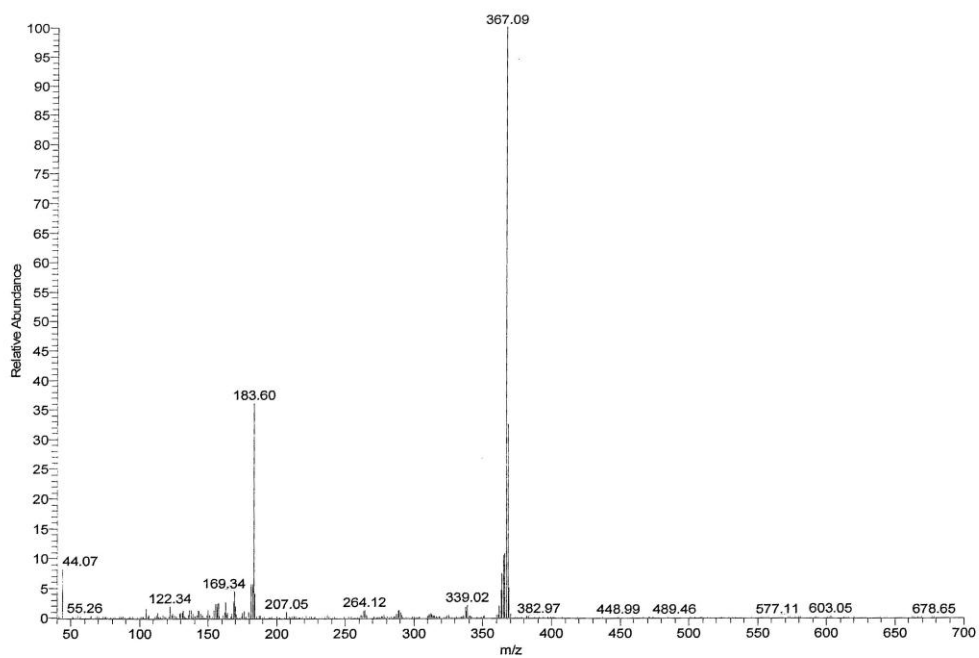

**Figure S10.** MS (EI) spectrum of **2**.



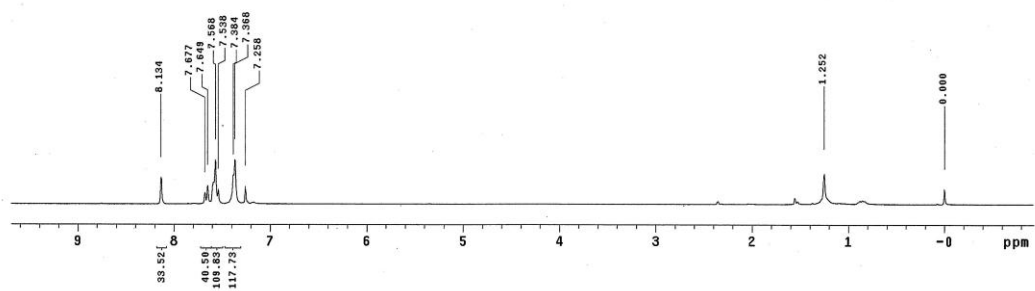

Figure S11.  $^1\text{H}$  NMR spectrum of **3** in  $\text{CDCl}_3$ .

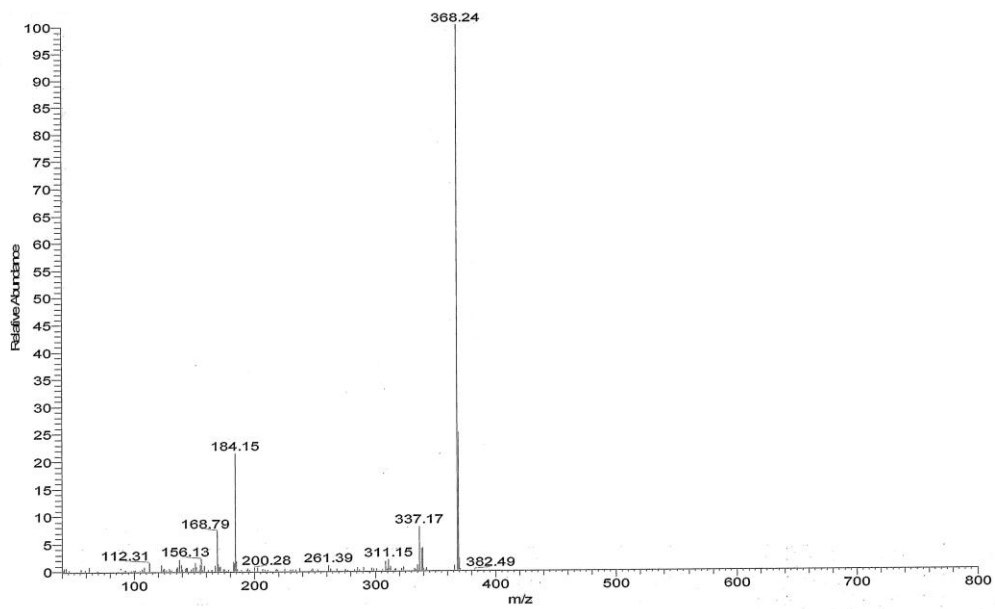

Figure S12. MS (EI) spectrum of **3**.

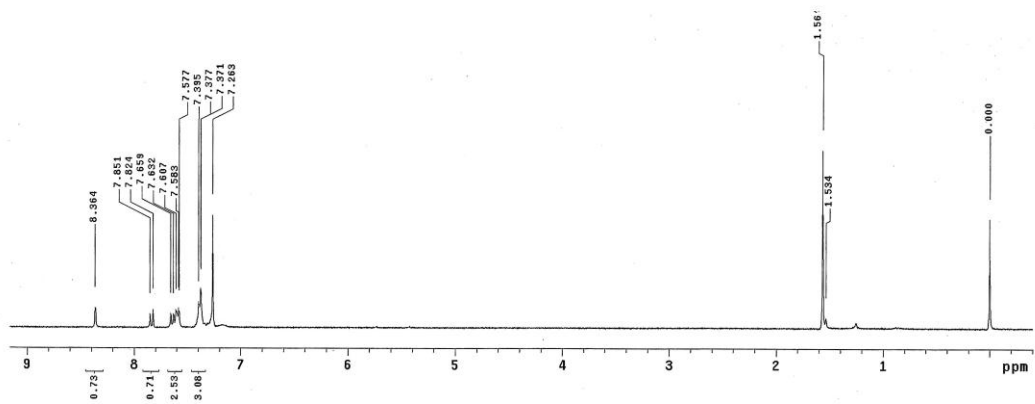

Figure S13.  $^1\text{H}$  NMR spectrum of 4 in  $\text{CDCl}_3$ .

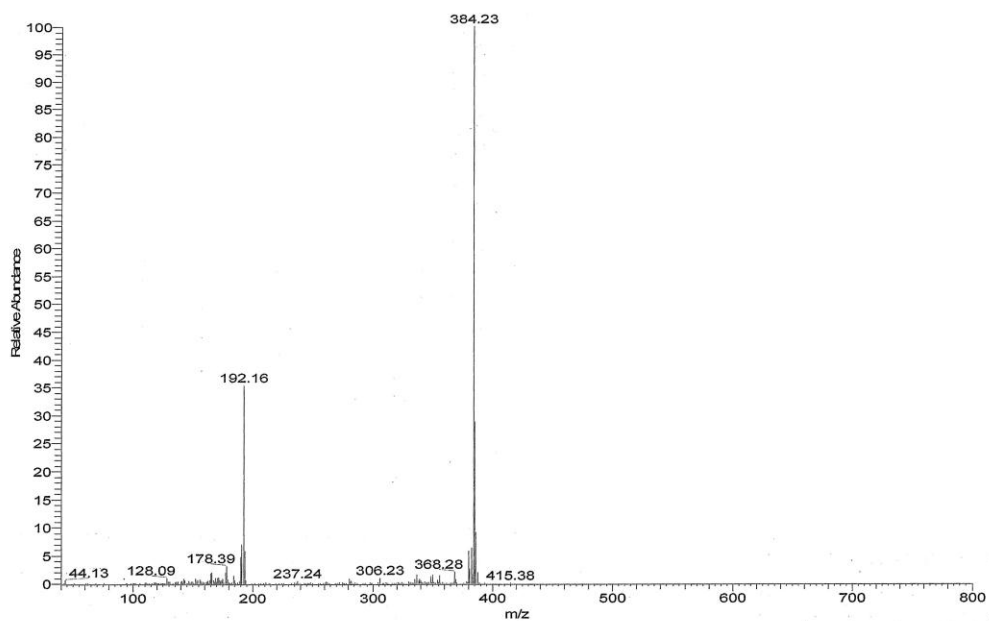

Figure S14. MS (EI) spectrum of 4.

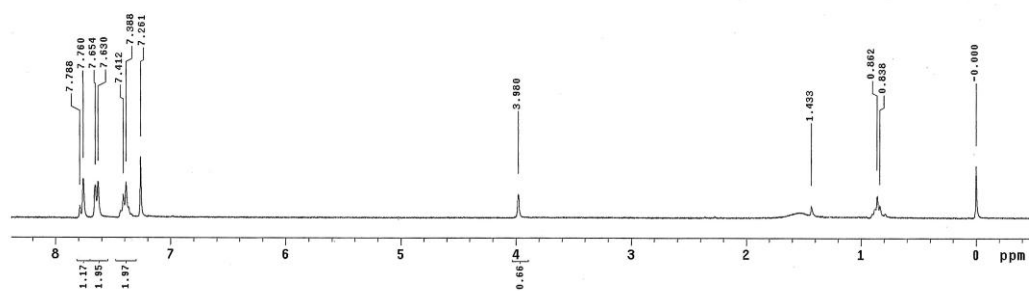

Figure S15.  $^1\text{H}$  NMR spectrum of  $\text{M}_\text{C}$  in  $\text{CDCl}_3$ .

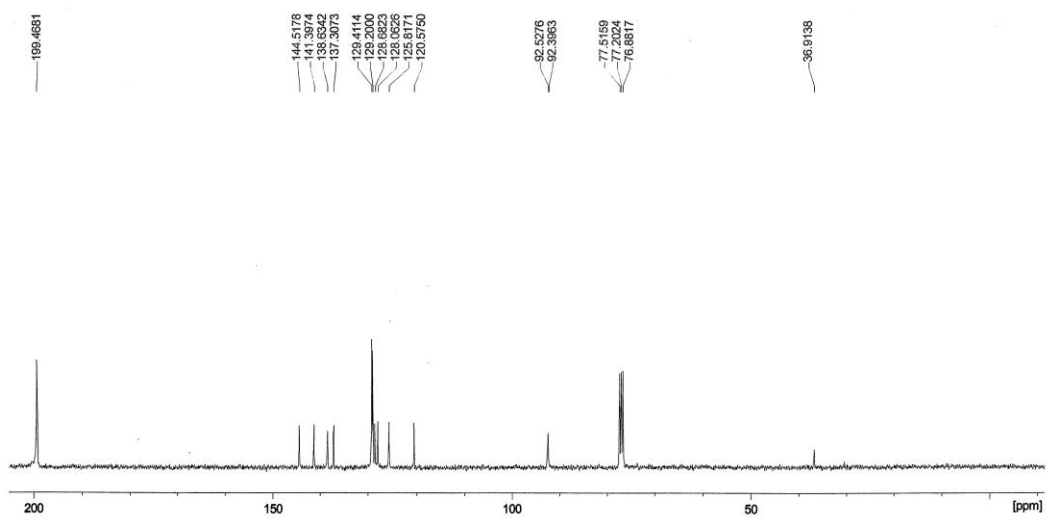

Figure S16.  $^{13}\text{C}$  NMR spectrum of  $\text{M}_\text{C}$  in  $\text{CDCl}_3$ .

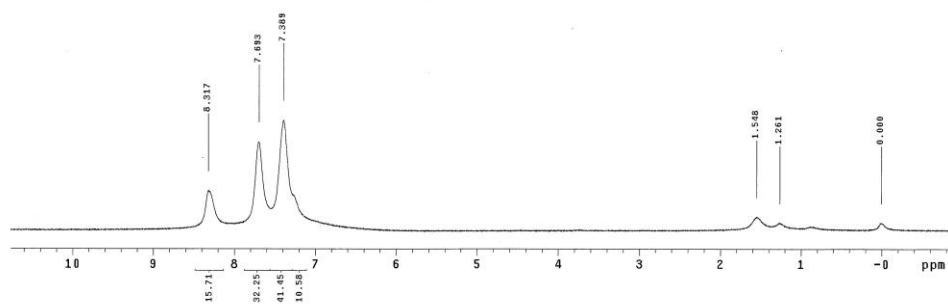

**Figure S17.**  $^1H$  NMR spectrum of  $M_N$  in  $CDCl_3$ .

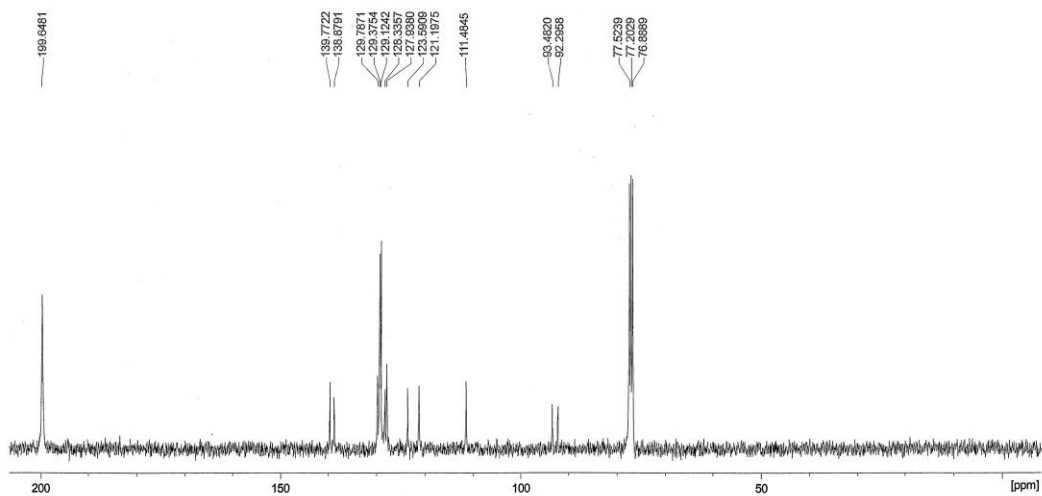

**Figure S18.**  $^{13}C$  NMR spectrum of  $M_N$  in  $CDCl_3$ .

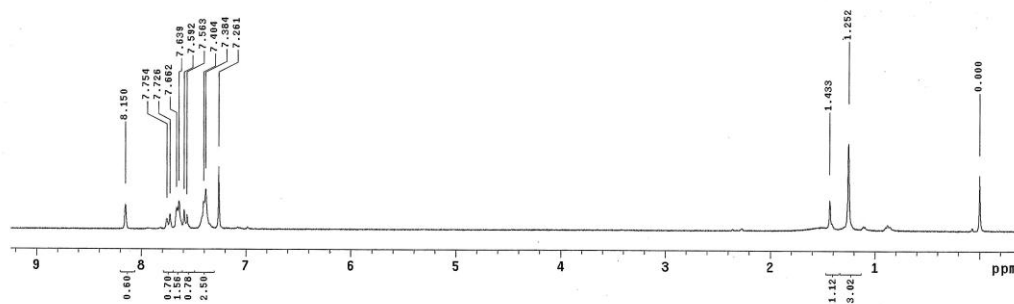

Figure S19.  $^1\text{H}$  NMR spectrum of  $\text{M}_0$  in  $\text{CDCl}_3$ .

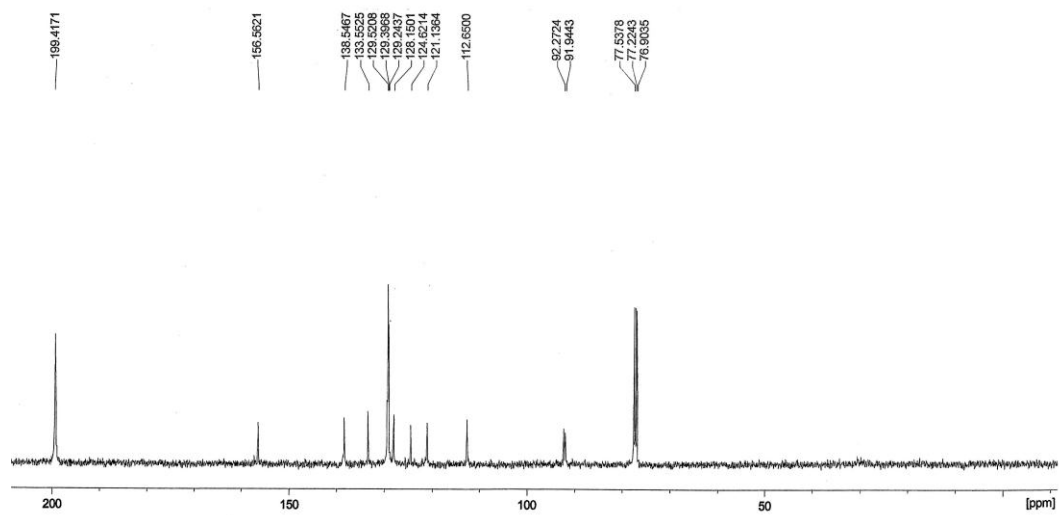

Figure S20.  $^{13}\text{C}$  NMR spectrum of  $\text{M}_0$  in  $\text{CDCl}_3$ .

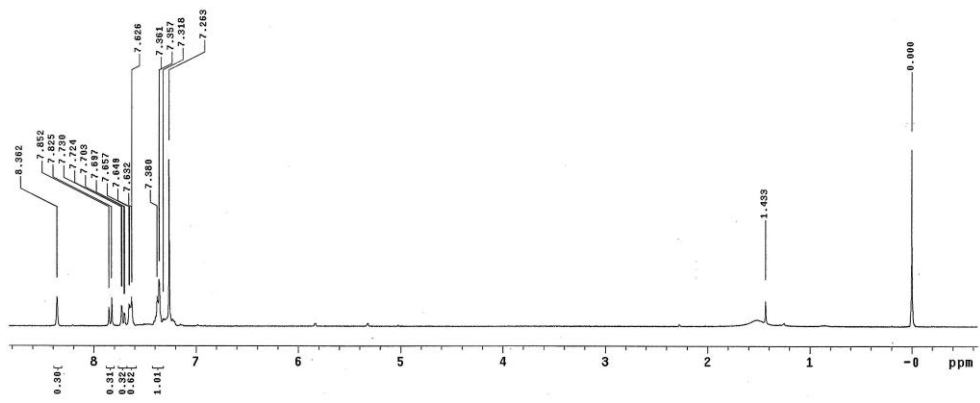

Figure S21.  $^1\text{H}$  NMR spectrum of  $\text{M}_5$  in  $\text{CDCl}_3$ .

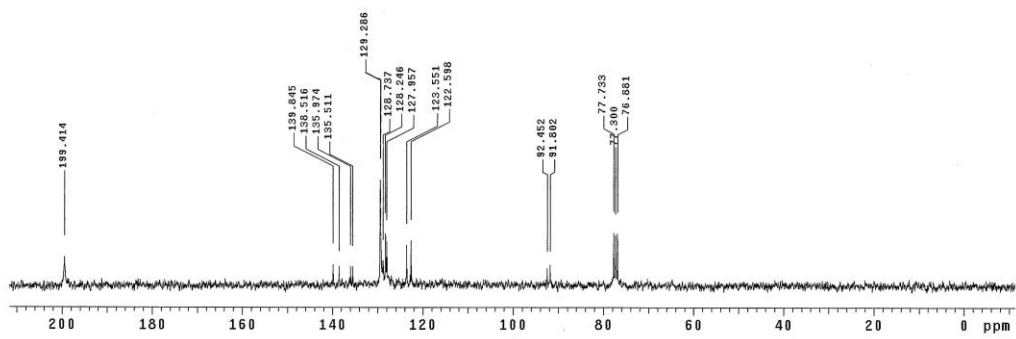

Figure S22.  $^{13}\text{C}$  NMR spectrum of  $\text{M}_5$  in  $\text{CDCl}_3$ .
